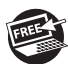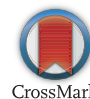

# The Use of Anthropometric Measures for Cardiometabolic Risk Identification in a Rural African Population

*Diabetes Care* 2014;37:e64–e65 | DOI: 10.2337/dc13-2096

Georgina A.V. Murphy,<sup>1,2</sup>  
Gershim Asiki,<sup>3</sup> Rebecca N. Nsubuga,<sup>3</sup>  
Elizabeth H. Young,<sup>1,2</sup>  
Janet Seeley,<sup>3,4,5</sup>  
Manjinder S. Sandhu,<sup>1,2</sup> and  
Anatoli Kamali<sup>3,4</sup>

It has been suggested that the current definitions of obesity may not be appropriate for African populations (1–3). However, few studies of anthropometric indicators of cardiometabolic risk have been conducted within sub-Saharan Africa, where obesity is a rapidly growing problem (4,5). A better understanding of the relationship between adiposity and the risk of cardiometabolic disease in sub-Saharan African populations will be important for the design and implementation of public health care and prevention programs.

This cross-sectional study assessed the ability of anthropometric measures to identify risk of diabetes, hypertension, and dyslipidemia, and considered the optimal cutoff points for BMI and waist circumference (WC) in a rural Ugandan general population, using receiver operating characteristic (ROC) analysis. A total of 6,136 participants, aged  $\geq 18$  years, were surveyed, of which 5,518 (57% women) had complete data for analysis. Data were collected using standard procedures. Hypertension was defined as systolic blood pressure (BP)  $\geq 140$  mmHg or diastolic BP  $\geq 90$  mmHg or reported treatment for raised BP. Dyslipidemia was defined as total cholesterol

$>5.2$  mmol/L and/or triglycerides  $>1.7$  mmol/L. Diabetes was defined as HbA<sub>1c</sub>  $\geq 6.5\%$  (Diabetes Control and Complications Trial/NGSP units equivalent to  $\geq 48$  mmol/mol International Federation of Clinical Chemistry and Laboratory Medicine).

The study population mean BMI was 21.9 kg/m<sup>2</sup> (SD 3.8), mean WC was 77.5 cm (SD 8.6), and mean waist-to-hip ratio (WHR) was 0.8 (SD 0.1). Among men, 6.4% were overweight (BMI 25–29.9 kg/m<sup>2</sup>), 0.6% were obese (BMI  $\geq 30$  kg/m<sup>2</sup>), 20.6% had hypertension, 16.8% had dyslipidemia, and 1.0% had diabetes. Among women, 17.0% were overweight, 5.3% were obese, 20.0% had hypertension, 20.2% had dyslipidemia, and 1.5% had diabetes.

The age-adjusted area under the curve (AUC) for differentiating participants with and without hypertension, diabetes, or dyslipidemia was highest for WC (0.75, 0.83, and 0.70, respectively), followed by BMI (0.74, 0.82, and 0.68, respectively) and then WHR (0.74, 0.78, and 0.66, respectively). AUCs were greater for women than men for all three anthropometric measures. WC performed as well as or better than lipids, BP, and HbA<sub>1c</sub> at identifying cardiometabolic risk (hypertension,

diabetes, or dyslipidemia). Results were broadly similar across age-groups.

The optimal cutoff for WC to identify cardiometabolic risk ranged from  $\geq 78$  cm to  $\geq 80$  cm for men and  $\geq 82$  cm to  $\geq 85$  cm for women (Table 1). Optimal cutoffs for BMI ranged from  $\geq 23$  kg/m<sup>2</sup> to  $\geq 25$  kg/m<sup>2</sup> for men and from  $\geq 24$  kg/m<sup>2</sup> to  $\geq 26$  kg/m<sup>2</sup> for women. Although broadly similar to the overall cutoff estimates, we observed variation among age-groups.

Replacing the currently recommended WC cutoffs with cutoffs of  $\geq 78$  cm for men and  $\geq 82$  cm for women would change the prevalence of abdominal obesity from 2.1 to 32.1% in men and from 38.4 to 30.9% in women in this population.

In this rural African population, we found that anthropometric measures, particularly WC, may be useful primary care screening tools for the identification of cardiometabolic risk. However, the currently recommended cutoffs for WC and BMI may not be appropriate for African populations. A systematic assessment of anthropometric measures and cardiometabolic risk across sub-Saharan Africa would help inform cardiometabolic risk evaluation guidelines for African populations and

<sup>1</sup>Department of Public Health and Primary Care, University of Cambridge, Cambridge, U.K.

<sup>2</sup>Wellcome Trust Sanger Institute, Hinxton, U.K.

<sup>3</sup>Medical Research Council/Uganda Virus Research Institute, Uganda Research Unit on AIDS, Entebbe, Uganda

<sup>4</sup>London School of Hygiene and Tropical Medicine, London, U.K.

<sup>5</sup>School of International Development, University of East Anglia, Norwich, U.K.

Corresponding author: Georgina A.V. Murphy, gm7@sanger.ac.uk.

M.S.S. and A.K. jointly directed this work.

© 2014 by the American Diabetes Association. See <http://creativecommons.org/licenses/by-nc-nd/3.0/> for details.

**Table 1—Optimal cutoff values for WC and BMI according to ROC analysis, including sensitivity ( $S_N$ ) and specificity ( $S_P$ ) for optimal and standard WC cutoffs**

|                               |         | Men        |           |           | Women     |           |           |
|-------------------------------|---------|------------|-----------|-----------|-----------|-----------|-----------|
|                               |         | Cutoff     | $S_N$ (%) | $S_P$ (%) | Cutoff    | $S_N$ (%) | $S_P$ (%) |
| <b>WC (cm)</b>                |         |            |           |           |           |           |           |
| Hypertension                  | Optimal | $\geq 78$  | 48.04     | 70.04     | $\geq 85$ | 34.02     | 80.17     |
|                               | Level 1 | $\geq 94$  | 7.01      | 98.93     | $\geq 80$ | 49.68     | 63.03     |
|                               | Level 2 | $\geq 102$ | 2.47      | 99.79     | $\geq 88$ | 23.73     | 85.78     |
| Diabetes                      | Optimal | $\geq 78$  | 79.17     | 66.78     | $\geq 82$ | 72.92     | 68.13     |
|                               | Level 1 | $\geq 94$  | 29.17     | 97.98     | $\geq 80$ | 72.92     | 60.97     |
|                               | Level 2 | $\geq 102$ | 16.67     | 99.48     | $\geq 88$ | 47.92     | 84.36     |
| Dyslipidemia                  | Optimal | $\geq 80$  | 43.80     | 81.27     | $\geq 82$ | 54.23     | 73.00     |
|                               | Level 1 | $\geq 94$  | 7.59      | 98.77     | $\geq 80$ | 72.92     | 61.01     |
|                               | Level 2 | $\geq 102$ | 3.04      | 99.80     | $\geq 88$ | 47.92     | 84.37     |
| <b>BMI (kg/m<sup>2</sup>)</b> |         |            |           |           |           |           |           |
| Hypertension                  | Optimal | $\geq 24$  | 20.41     | 87.27     | $\geq 26$ | 25.00     | 82.42     |
|                               | Level 1 | $\geq 25$  | 14.02     | 92.62     | $\geq 25$ | 29.43     | 75.16     |
|                               | Level 2 | $\geq 30$  | 2.27      | 99.73     | $\geq 30$ | 9.97      | 94.35     |
| Diabetes                      | Optimal | $\geq 25$  | 41.67     | 91.59     | $\geq 25$ | 58.33     | 74.74     |
|                               | Level 1 | $\geq 25$  | 41.67     | 91.59     | $\geq 25$ | 58.33     | 74.74     |
|                               | Level 2 | $\geq 30$  | 8.33      | 99.40     | $\geq 30$ | 25.00     | 93.77     |
| Dyslipidemia                  | Optimal | $\geq 23$  | 36.46     | 80.30     | $\geq 24$ | 49.06     | 69.52     |
|                               | Level 1 | $\geq 25$  | 20.00     | 93.52     | $\geq 25$ | 39.81     | 77.79     |
|                               | Level 2 | $\geq 30$  | 2.53      | 99.69     | $\geq 30$ | 13.32     | 95.21     |

Levels 1 and 2 refer to standard WC and BMI cutoffs.

enhance population prevention programs.

**Acknowledgments.** The authors thank the General Population Cohort team and all other Medical Research Council (MRC) staff who contributed to this study.

**Funding.** This work was sponsored by MRC U.K. [grant G0801566 and G0901213-92157] awarded to M.S.S. and core funding to MRC/Uganda Virus Research Institute. G.A.V.M. was supported by the Gates Cambridge Scholarship.

**Duality of Interest.** No potential conflicts of interest relevant to this article were reported.

**Author Contributions.** G.A.V.M. and M.S.S. researched data and wrote the manuscript. E.H.Y., J.S., M.S.S., and A.K. developed hypotheses and developed the study design. G.A.V.M., G.A., and R.N.N. led data collection and management. All authors reviewed the manuscript. M.S.S. is the guarantor of this work and, as such, had full access to all the data in the study and takes responsibility for the integrity of the data and the accuracy of the data analysis.

## References

- Okosun IS, Rotimi CN, Forrester TE, et al. Predictive value of abdominal obesity cut-off points for hypertension in blacks from West African and Caribbean island nations. *Int J Obes Relat Metab Disord* 2000;24:180–186
- Crowther NJ, Norris SA. The current waist circumference cut point used for the diagnosis of metabolic syndrome in sub-Saharan African women is not appropriate. *PLoS One* 2012;7:e48883
- Motala AA, Esterhuizen T, Pirie FJ, Omar MA. The prevalence of metabolic syndrome and determination of the optimal waist circumference cutoff points in a rural South African community. *Diabetes Care* 2011;34:1032–1037
- Lim SS, Vos T, Flaxman AD, et al. A comparative risk assessment of burden of disease and injury attributable to 67 risk factors and risk factor clusters in 21 regions, 1990–2010: a systematic analysis for the Global Burden of Disease Study 2010 [published correction appears in *Lancet* 2013;381:628]. *Lancet* 2012;380:2224–2260
- Swinburn BA, Sacks G, Hall KD, et al. The global obesity pandemic: shaped by global drivers and local environments. *Lancet* 2011;378:804–814
